# Supplementary material for: A three-dimensional macroporous antimony@carbon composite as a high-performance anode material for potassium-ion batteries
Source: Royal Society of Chemistry journal article supplement (doi:10.1039/c9ta01968e), 2019-01-01
Supplement: c9ta01968e1.pdf [file c9ta01968e1.pdf]

# Supporting Information

## **Three-dimensional macroporous antimony@carbon composite as a high-performance anode material for potassium-ion batteries**

Xiao-Dong He, Ze-Hua Liu, Jia-Ying Liao, Xiang Ding, Qiao Hu, Li-Na Xiao, Shuo

Wang, Chun-Hua Chen\*

*CAS Key Laboratory of Materials for Energy Conversions, Department of Materials Science and Engineering & Collaborative Innovation Center of Suzhou Nano Science and Technology, University of Science and Technology of China, Anhui Hefei 230026, China*

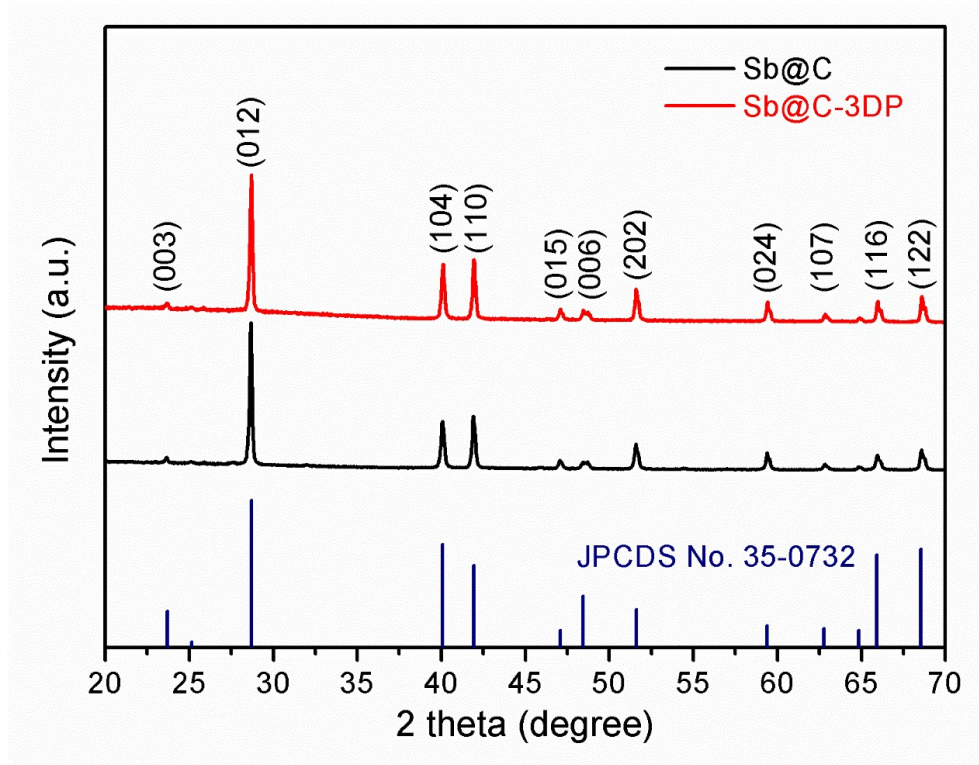

**Fig. S1.** XRD patterns of Sb@C and Sb@C-3DP.

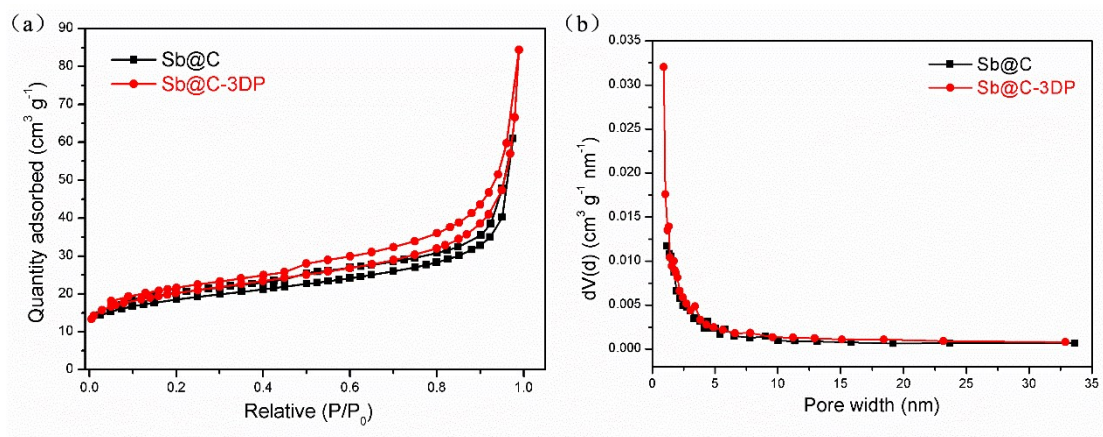

**Fig. S2.** (a) Nitrogen adsorption-desorption isotherms and (b) the pore size distribution of Sb@C and Sb@C-3DP.

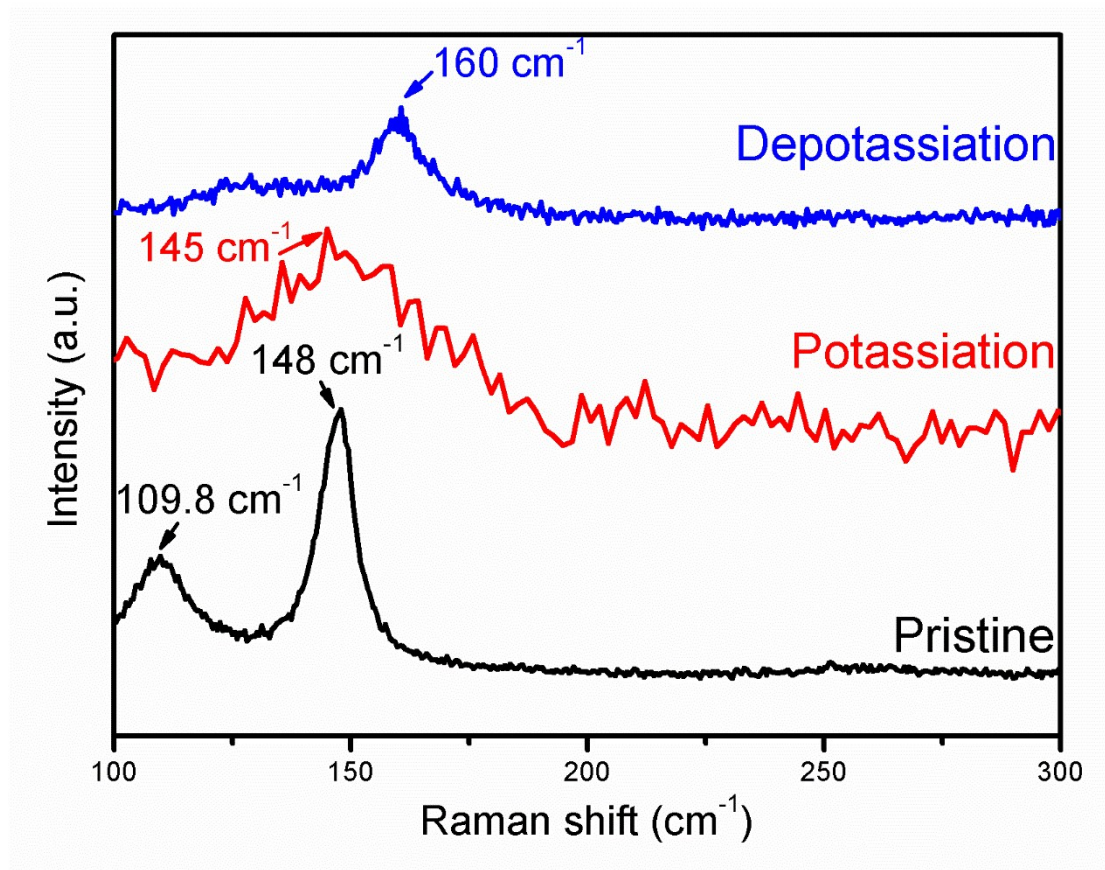

**Fig. S3.** EX situ Raman spectroscopy of the pristine Sb@C-3DP, potassiation and depotassiation electrode.

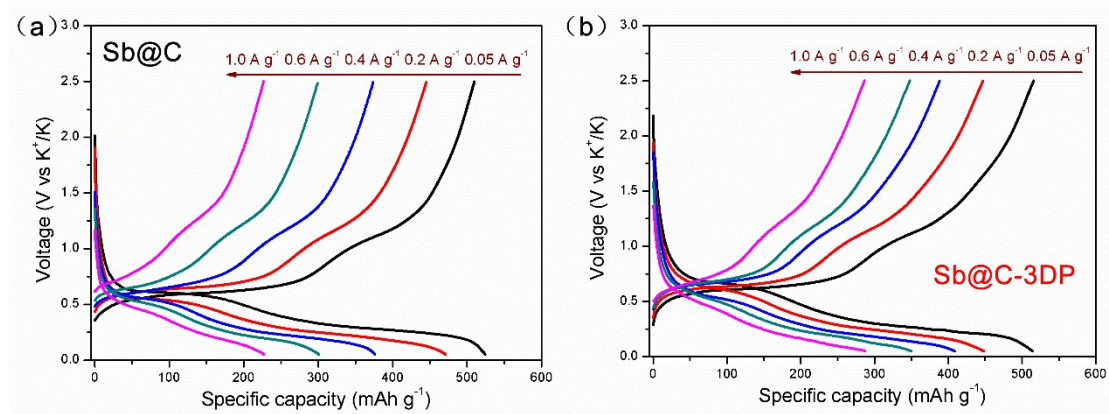

**Fig. S4.** Rate capabilities of (a) Sb@C and (b) Sb@C-3DP at various current densities from 0.05 to  $1.0 \text{ A g}^{-1}$ .

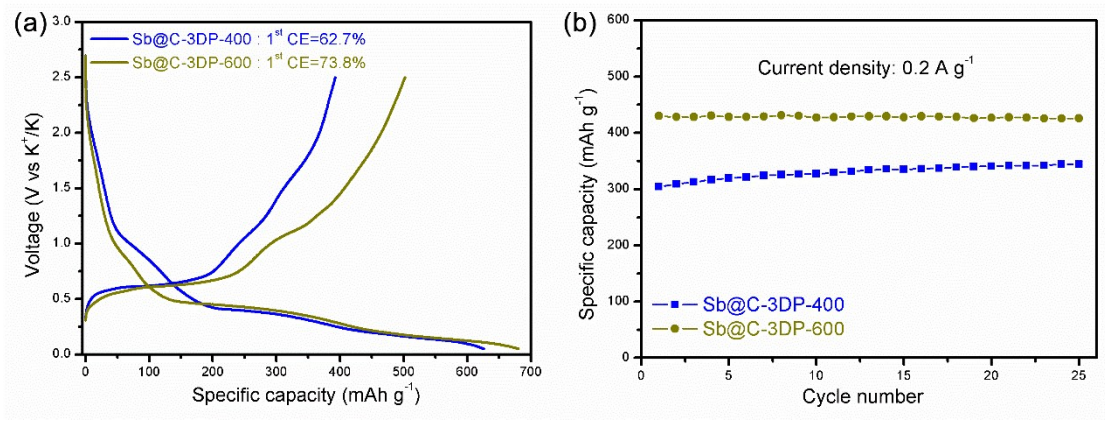

**Fig. S5.** Electrochemical performances of Sb@C-3DP-400 and Sb@C-3DP-600 electrode. (a) Initial discharge/charge curves at 0.05 A g<sup>-1</sup>. (b) Cycling property at 0.2 A g<sup>-1</sup>.

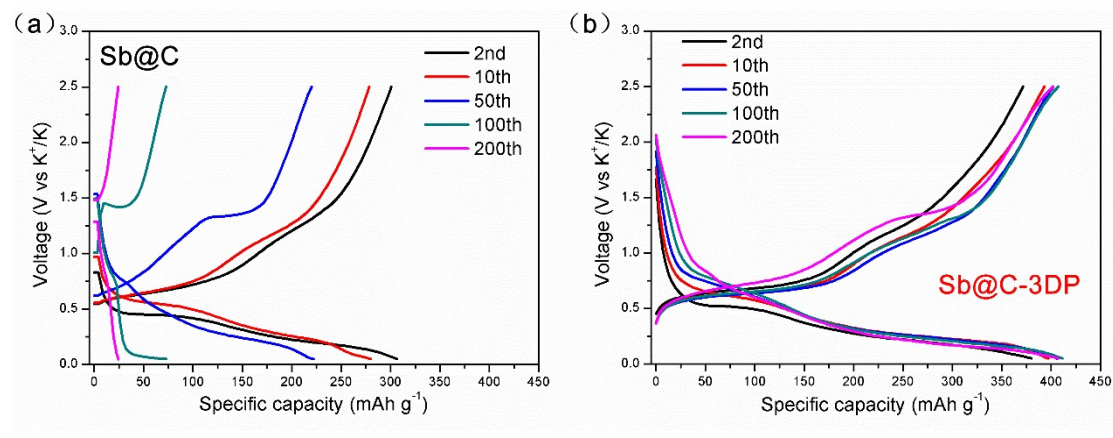

**Fig. S6.** Selected charge-discharge profiles of (a) Sb@C and (b) Sb@C-3DP at 0.5 A g<sup>-1</sup>.

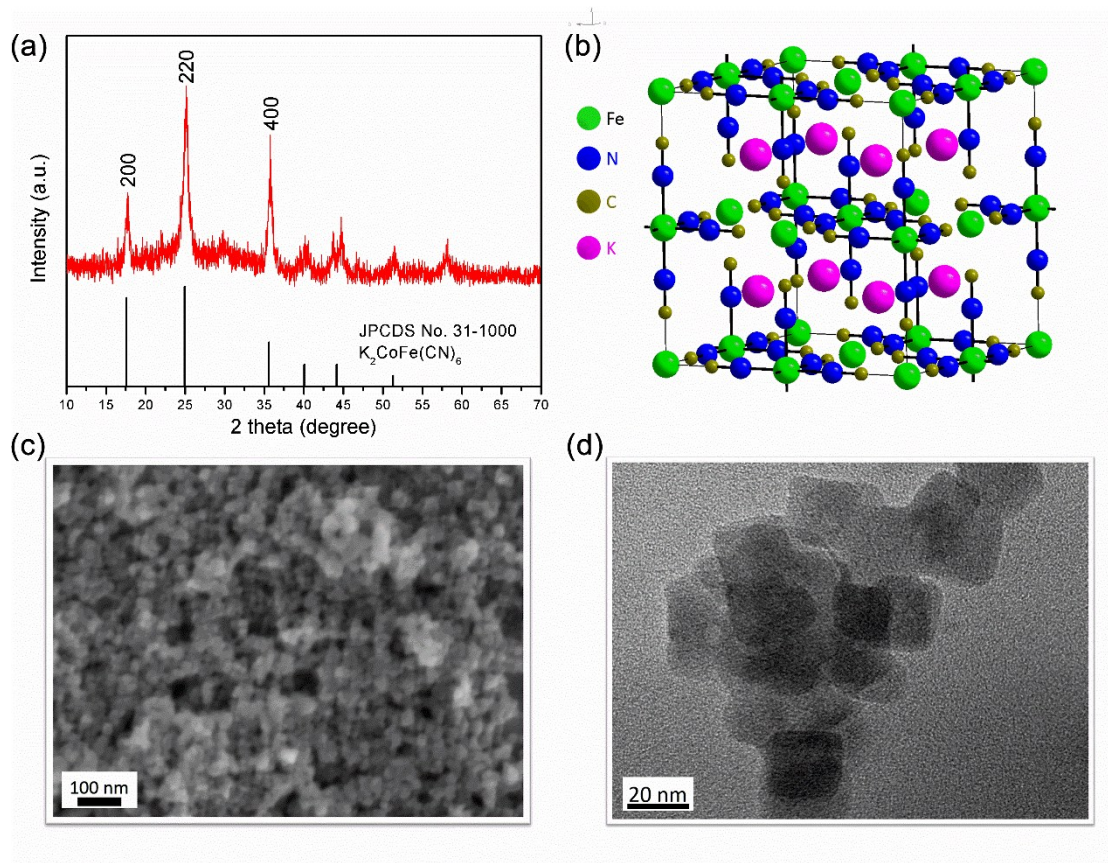

**Fig. S7.** The characterizations of KFeHCF cathode: (a) XRD pattern. (b) Crystal structure. (c) SEM image and (d) TEM image.

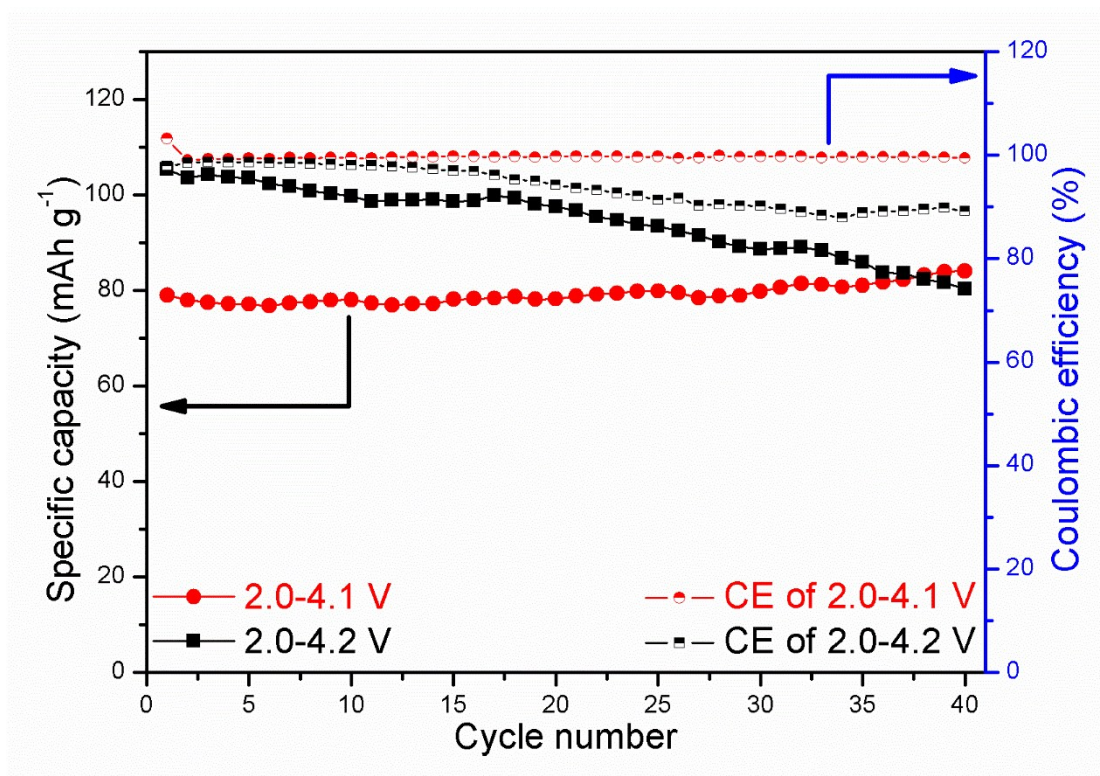

**Fig. S8.** Electrochemical performance of KFeHCF/K half-cells at different charge-discharge interval.
